# Supplementary material
Source: PubMed Central journal article supplement (PMC6168307)
Supplement: 10.1194_M085258_jlr.M085258-1.pdf [file 10.1194_M085258_jlr.M085258-1.pdf]

**Supplemental data**

**Structural determinant of functionality in acyl lipid desaturases**

**Diego E. Sastre, Emilio Saita, Antonio D. Uttaro, Diego de Mendoza and Silvia G. Altabe\* .**

Instituto de Biología Molecular y Celular de Rosario (IBR), and Departamento de Microbiología, Facultad de Ciencias Bioquímicas y Farmacéuticas, Universidad Nacional de Rosario, Esmeralda y Ocampo, S2002LRKRosario, Argentina.

\*Corresponding author: [altabe@ibr-conicet.gov.ar](mailto:altabe@ibr-conicet.gov.ar)

**Figure S1**

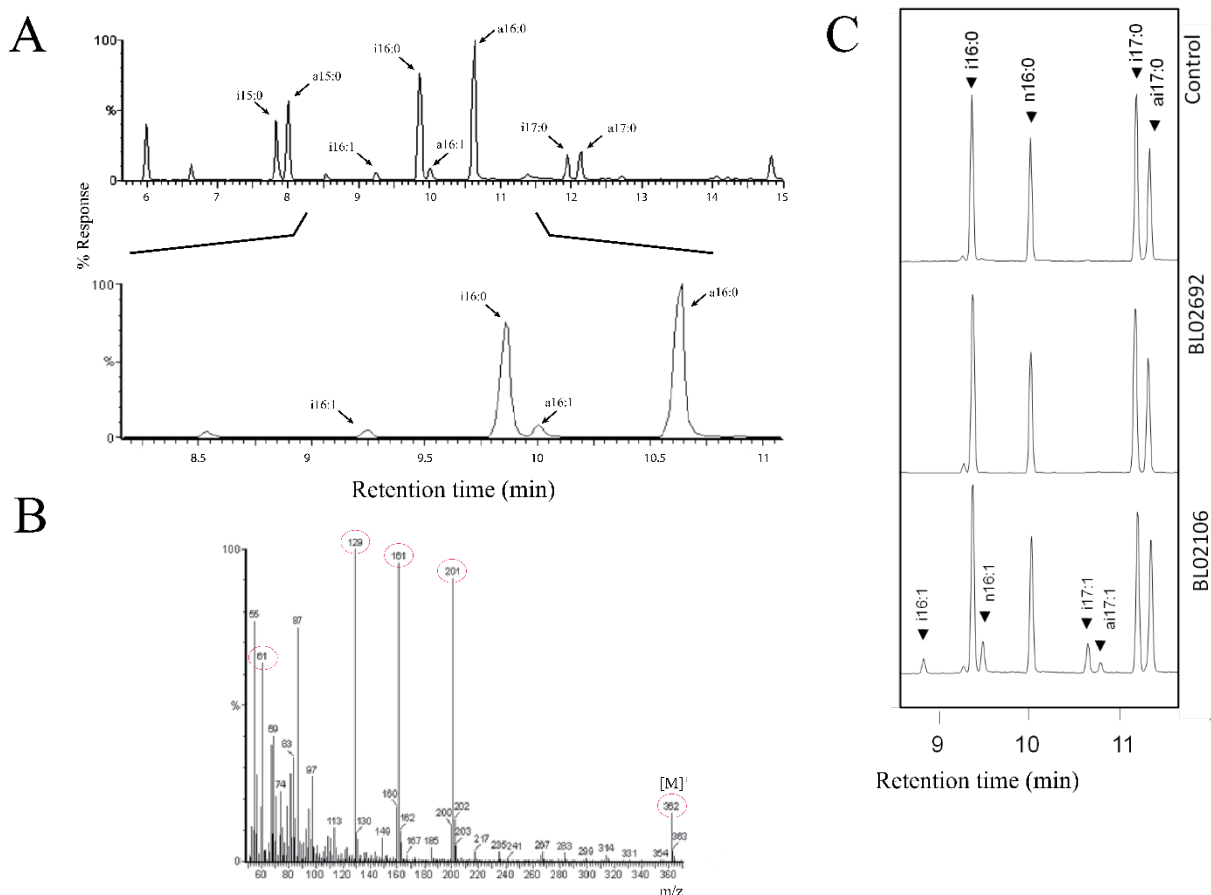

**Figure S1:** Fatty acids synthesized by *Bacillus* strains. (A) GC-MS of FAME of *B. licheniformis* ATCC14580, (B) GC-MS of FAME of *B. subtilis* LC5 strains expressing ORF BL02692 and ORF BL02106. Fatty acids of *Bacillus* strains were extracted, converted in methyl esters and analyzed by GC-MS. The peaks corresponding to the identified fatty acids are indicated by arrows in the chromatograms. The numbers on the x axis represent times (in minutes). i, iso-branched chain fatty acids (BCFAs); a, anteiso-BCFAs; n, normal. Control represent the *B. subtilis* LC5 strain carrying the empty vector (EV) while BLO 02692 and BLO 02106 represent *B. subtilis* LC5 strains expressing the corresponding ORFs of *B. licheniformis* ATCC14580. The region between 8 and 11 min of the chromatogram shown in panel A is twofold magnified. (C) Mass spectrum of dimethyl disulfide derivatives separated by GC of iso-C<sub>16:1</sub>. [M]<sup>+</sup>, molecular ion. The mass spectrum of the adducts shows a weak ion at *m/z* 362 corresponding to the theoretical mass of [M]<sup>+</sup> from DMDS adducts of C<sub>16</sub> monosaturated fatty acid. Two prominent ions are formed by cleavage between the methylthio-

substituted (CH<sub>3</sub>S) carbons located at the original site of the unsaturation. The strong ions at  $m/z$  161 and  $m/z$  201 indicate the position of the double bond at  $\Delta 5$  in the iso-C16:1. A major ion at  $m/z$  129 is due to loss of methanol (CH<sub>3</sub>OH) from ion  $m/z$  161. Ion  $m/z$  61 is distinctive in DMDS adducts.

**Figure S2**

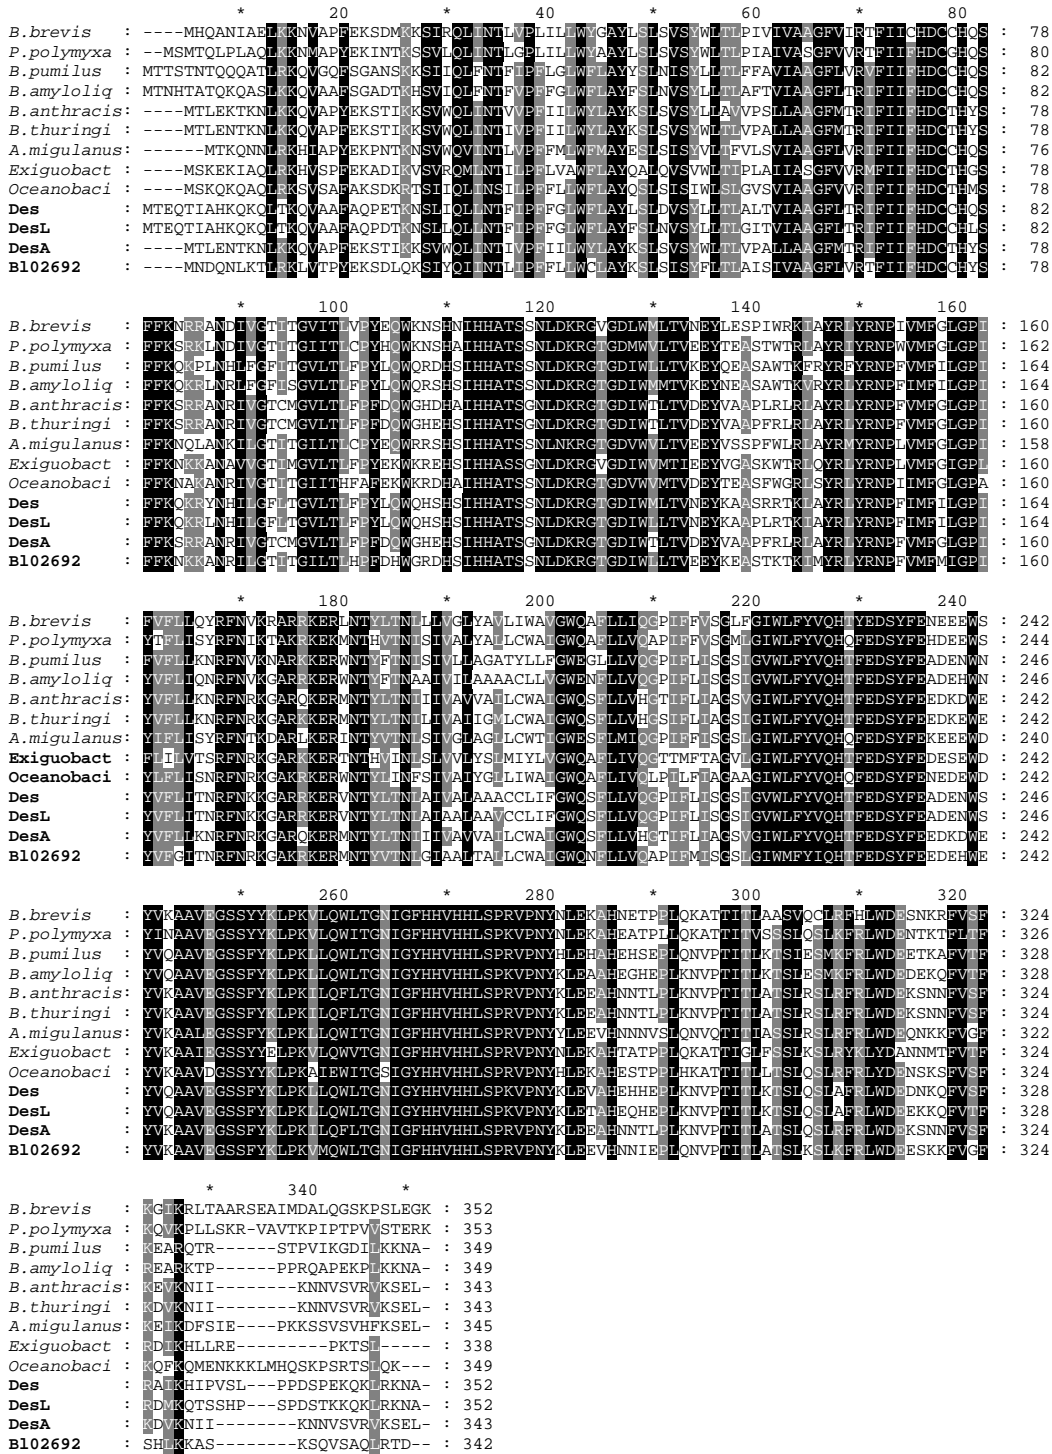

**Figure S2. Multiple sequence alignment of full-length Δ5 acyl-lipid desaturases from Firmicutes.**

The amino acid sequences of these desaturases were aligned using Clustal Omega. Completely conserved residues are shaded in black and partially conserved are shaded in grey.

**Figure S3**

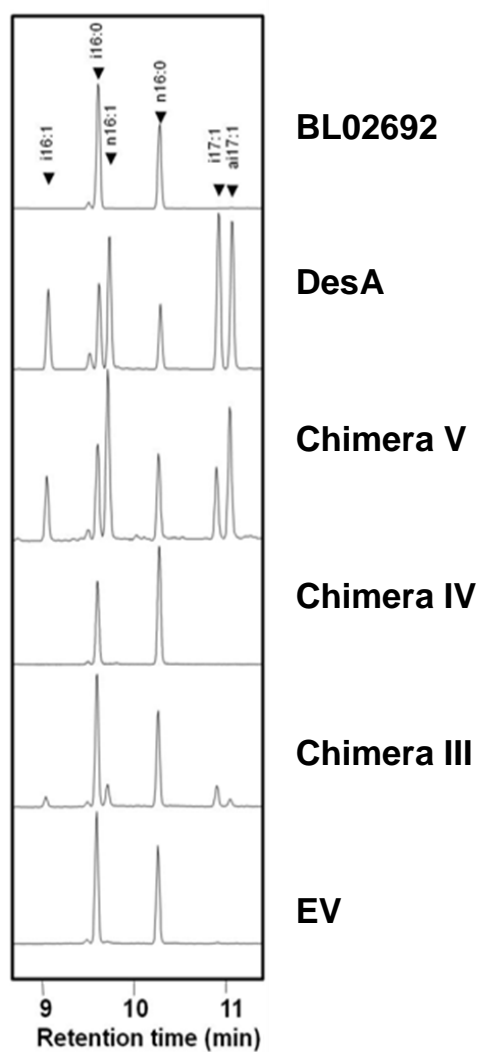

**Figure S3. GC-MS analysis of FAME of *B. subtilis* strains.** Gas chromatography of the fatty acid methyl esters prepared from *Bacillus subtilis* LC5 transformed with the wild type (ORF BL02692 from *B. licheniformis* and DesA from *B. cereus*) and chimeric desaturases as indicated in each panel. EV represents the *B. subtilis* LC5 strain carrying the empty vector. The peaks corresponding to identified FA are indicated by arrows. The numbers on the *x* axis represent times (in minutes). i, iso-BCFAs; a, anteiso-BCFAs; n, normal fatty acids.

Figure S4

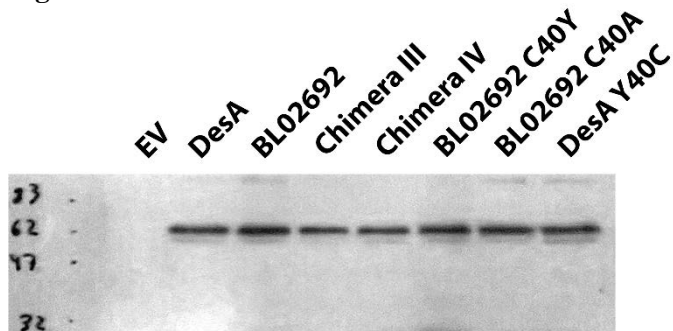

**Figure S4. Western blot analysis of proteins heterologous expressed in *Bacillus subtilis* LC5.**

Expression of protein was induced with 0,5% xylose and harvested after 4-5 hours. Cleared cell lysates containing the chimeric and wild type proteins were resolved on 12% gel electrophoresis and probed by Western blot using anti-GFP tag monoclonal antibody in 1:1000 dilution. As a control we used the extract obtained from *B. subtilis* LC5 strain carrying the empty vector (EV) strain. DesA, BL02692, Chimera III, IV, BL02692C40Y BL02692C40A and DesAY40C are extracts obtained from *B. subtilis* LC5 transformed with the wild type (ORF BL02692 from *B. licheniformis* and DesA from *B. cereus*) and the constructions described in Table 1. Positions of molecular weight markers are indicated at left.

**Figure S5**

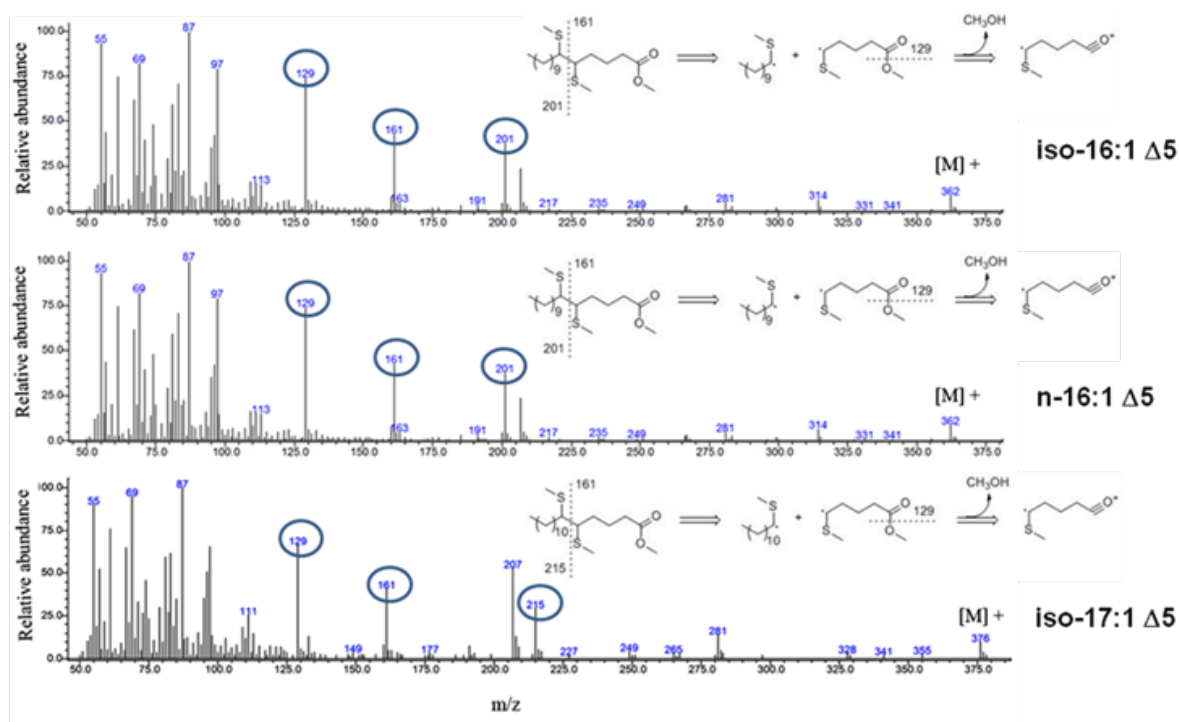

**Figure S5. Mass spectra of DMDS derivatives of the fatty acids separated by GC of iso-C16:1, n-16:1 and iso-C17:1.** Figure illustrates examples of the electron impact mass spectrum of the DMDS adducts of iso-C16:1, n-16:1 and iso-C17:1 fatty acids produced by desaturases wild type and chimeras. [M]<sup>+</sup>, molecular ion. The mass spectrum of the adducts shows weak ions at  $m/z$  362 and  $m/z$  376 corresponding to the theoretical mass of [M]<sup>+</sup> from DMDS adducts of C<sub>16</sub> and C<sub>17</sub> monosaturated fatty acids, respectively. Two prominent ions are formed by cleavage between the methylthio-substituted (CH<sub>3</sub>S) carbons located at the original site of the unsaturation. The strong ions at  $m/z$  161 and  $m/z$  201 indicate the position of the double bond at Δ5 in the iso-C16:1 and n-C16:1 fatty acids. The ions observed at  $m/z$  161 and  $m/z$  215 indicate a Δ5 double bond in the iso-C17:1 fatty acid. A major ion at  $m/z$  129 is due to loss of methanol (CH<sub>3</sub>OH) from ion  $m/z$  161.

Figure S6

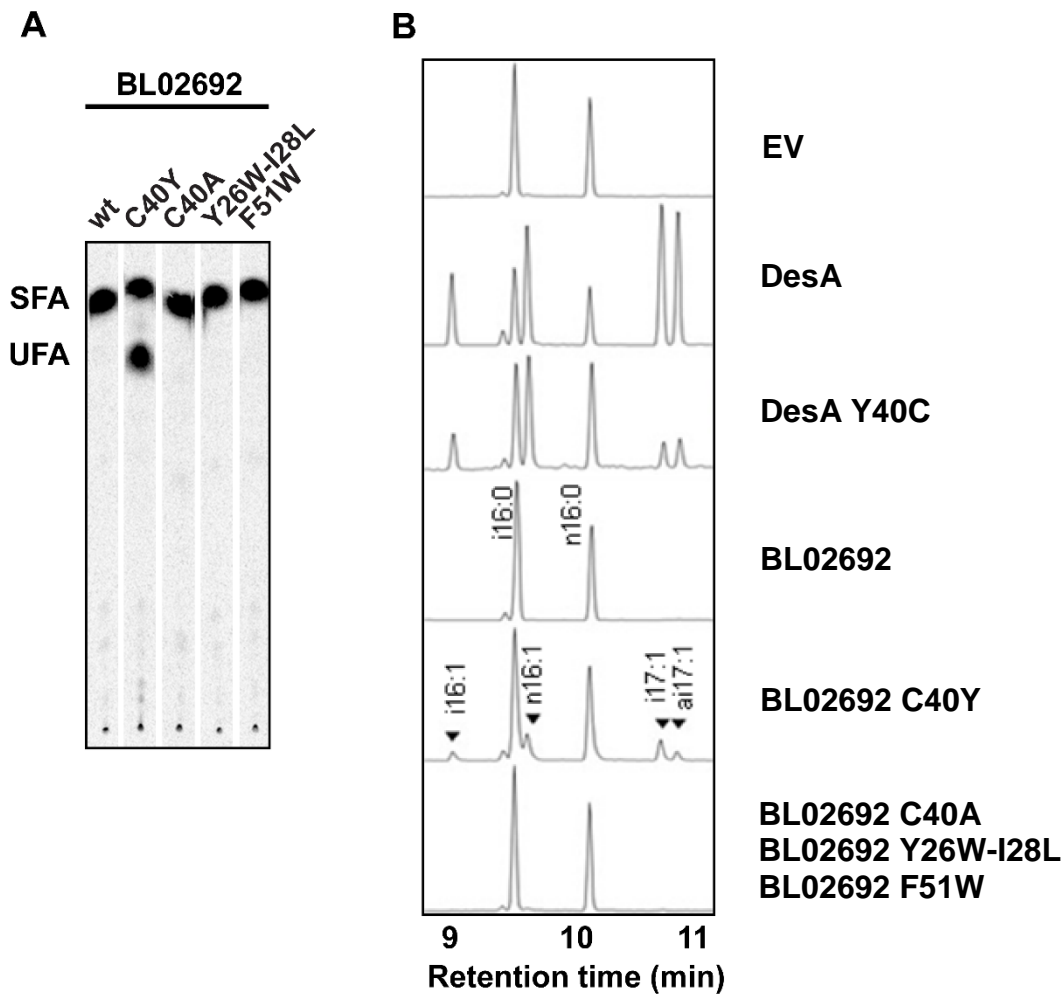

**Figure S6. Fatty acids synthesized by *B. subtilis* strains expressing wild type and mutant desaturases.** A) Autoradiogram of the products of [<sup>14</sup>C]-palmitate labeling of *B. subtilis* LC5 expressing ORFBL02692 wild type (wt) and derivative strains described in Table I. Cells were grown overnight at 37°C in MM, washed, resuspended in fresh MM with or without 0,5% xylose, and labeled with 1 μCi ml<sup>-1</sup>-[<sup>14</sup>C] palmitate for 4-5 hs at 37°C. Fatty acids were converted to FAME and analyzed using 10% silver nitrate-impregnated Silica Gel G plates and developed in toluene solvent at -20°C. The radioactivity on the plates was visualized using a PhosphorImager screen. UFA, unsaturated fatty acids, SFA, saturated fatty acids. B) Gas chromatography of the FAME prepared from *Bacillus subtilis* LC5 expressing the wild type (ORF BL02692 from *B. licheniformis* and DesA from *B. cereus*) and derivatives mutants desaturases (DesA Y40C, BL02692 C40Y, BL02692 C40A, BL02692 Y26W-I28L and BL0269 F51W) described in Table I, are indicated in each panel. EV represents the *B. subtilis* LC5



strain carrying the empty vector used as a control. The peaks corresponding to the identified FA are indicated by arrows. The numbers on the  $x$  axis represent times (in minutes). i, iso-BCFAs; a, anteiso-BCFAs; n, normal.

Figure S7

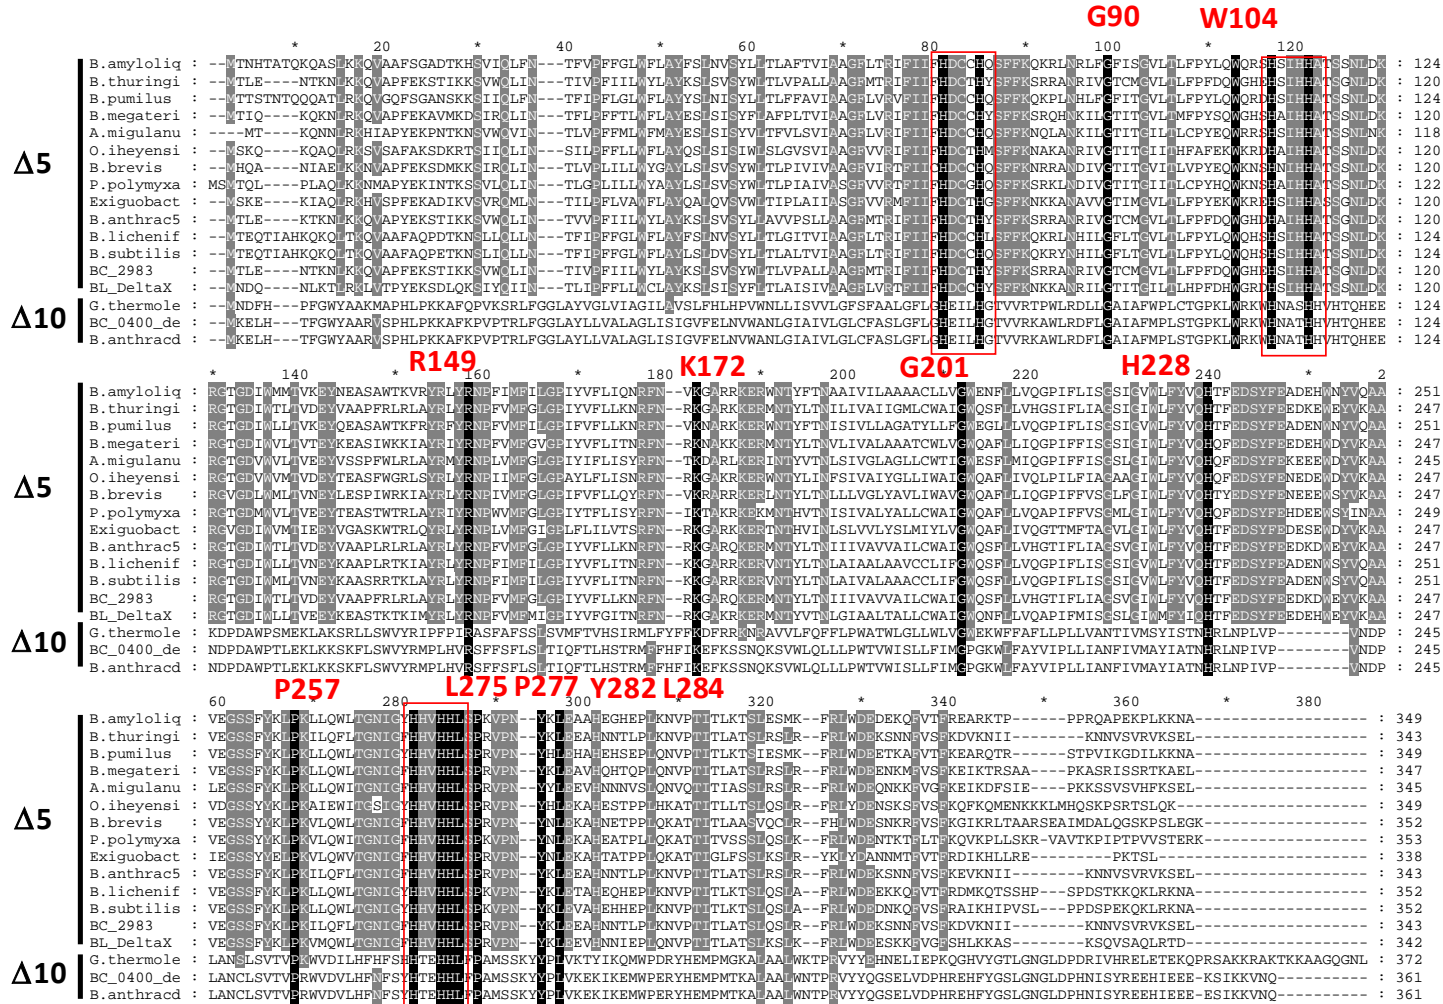

**Figure S7. Multiple sequence alignment of  $\Delta 5$  and  $\Delta 10$ -acyl-lipid desaturases from *Firmicutes*.** The deduced amino acid sequences of these desaturases were aligned by using ClustalW. The eleven amino acid residues conserved in all the proteins are shaded in black and indicated in red. Histidine cluster are denoted by hollow red boxes.

Figure S8

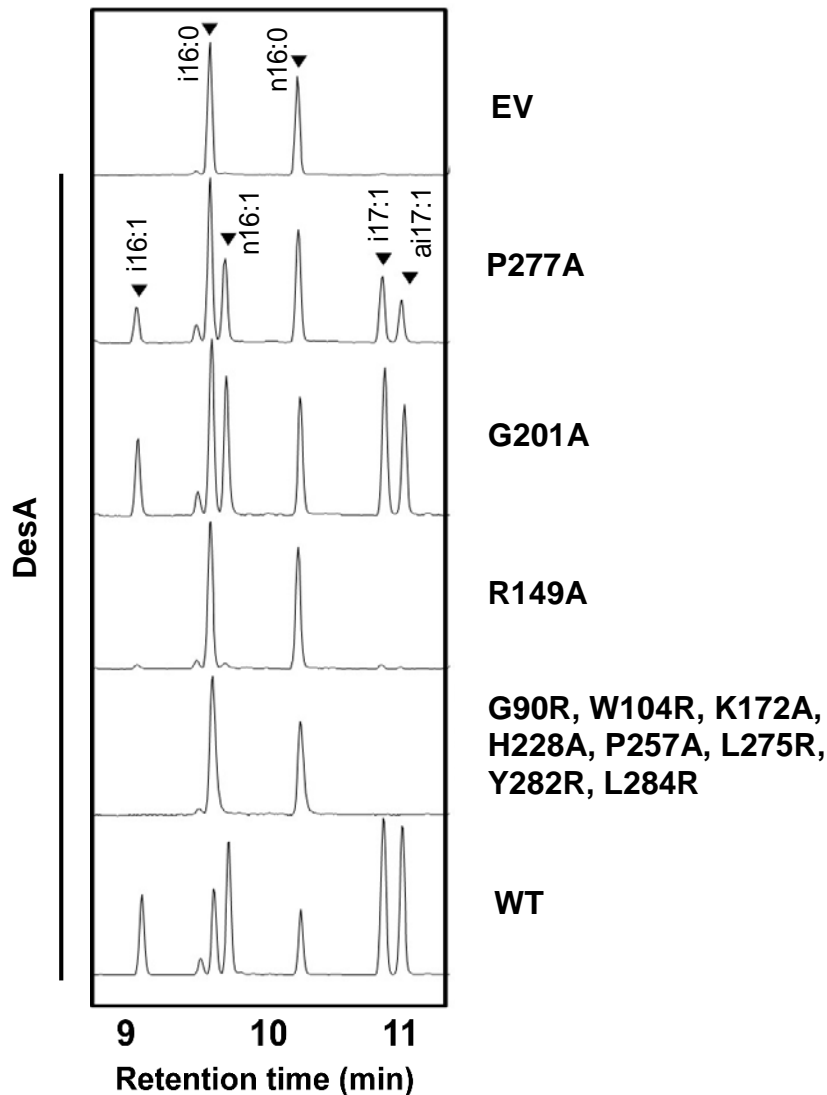

Figure S8. Fatty acids synthesized by *B. subtilis* LC5 strain expressing *B. cereus* DesA derivatives desaturases. Gas chromatography of the FAME prepared from *B. subtilis* LC5 expressing the *B. cereus* wild type DesA (WT) and derivatives mutants of DesA (P277A, G201A, R149A, G90R, W104R, K172A, H228A, P257A, L275R, Y282R, and L284R) are indicated in each panel. EV represents the *B. subtilis* LC5 strain carrying the empty vector. The peaks corresponding to the identified FA are indicated by arrows. The numbers on the x axis represent times (in minutes). i, iso-BCFAs; a, anteiso-BCFAs; n, normal.

| Transmembrane predictor | N°T Ms | N-ter | C-ter | Transmembrane segments ubication |       |        |         |         |         |         | His boxes |     |     |
|-------------------------|--------|-------|-------|----------------------------------|-------|--------|---------|---------|---------|---------|-----------|-----|-----|
|                         |        |       |       | 1                                | 2     | 3      |         |         |         |         |           |     |     |
| <b>HMMTOP</b>           | 7      | in    | out   | 24-41                            | 46-63 | 88-105 | 148-165 | 184-201 | 206-225 | 250-267 | in        | out | out |
| <b>MEMSAT(PSPRED)</b>   | 6      | in    | in    | 26-45                            | 49-73 | 87-102 | 145-165 | 181-202 | 206-227 |         | in        | out | in  |
| <b>SOSUI</b>            | 6      | in    | in    | 24-46                            | 51-73 | 87-109 | 142-164 | 182-204 | 208-230 |         | in        | out | in  |
| <b>PHOBIUS</b>          | 6      | in    | in    | 25-42                            | 48-72 | 84-101 | 147-164 | 184-201 | 207-226 |         | in        | out | in  |
| <b>OCTOPUS</b>          | 4      | in    | in    | 28-44                            | 51-71 |        |         | 182-202 | 206-226 |         | in        | in  | in  |
| <b>TOPPRED2</b>         | 6      | in    | in    | 23-43                            | 52-72 | 84-104 | 149-169 | 182-202 | 206-226 |         | in        | out | in  |
| <b>TMHMM</b>            | 5      | out   | in    | 24-43                            | 48-70 |        | 147-164 | 183-202 | 207-226 |         | out       | out | in  |
| <b>DAS</b>              | 4      | in    | in    | 28-43                            | 50-70 |        |         | 185-201 | 205-224 |         | in        | in  | in  |
| <b>SPLIT 4.0</b>        | 3      | in    | out   |                                  | 46-74 |        |         | 182-201 | 205-227 |         | out       | out | out |
| <b>TMMOD</b>            | 6      | in    | in    | 24-43                            | 50-70 | 85-105 | 147-165 | 182-202 | 206-226 |         | in        | out | in  |
| <b>TOPCONS</b>          | 4      | in    | in    | 24-44                            | 51-71 |        |         | 182-202 | 206-226 |         | in        | in  | in  |
| <b>consensus</b>        | 4      | in    | in    | 25-43                            | 50-70 |        |         | 183-202 | 206-226 |         | in        | in  | in  |

**Table S1. Topology prediction servers.** The predicted transmembrane domains of the acyl-lipid desaturase DesA from *B. cereus* are indicated.

**Table S2. Fatty acid composition of *B. subtilis* strains<sup>a</sup>.**

|           | DesA     |          | DesAY40C  |          | BL02692 C40Y |         | EV       |     |
|-----------|----------|----------|-----------|----------|--------------|---------|----------|-----|
|           | SFA      | UFA      | SFA       | UFA      | SFA          | UFA     | SFA      | UFA |
| <C16      | 64.9±1.6 | nd       | 67.4± 3.7 | nd       | 71.2±3.9     | nd      | 70±3     | nd  |
| i-C16     | 3.0±0.5  | 3.6±0.6  | 4.1±0.7   | 2.3±0.6  | 6.3±0.7      | 0.4±0.1 | 7.4±0.8  | nd  |
| n-C16     | 2.6±0.1  | 5.5±0.3  | 4.9±0.8   | 4.6±0.4  | 4.6±0.4      | 1.4±0.2 | 6.6±0.3  | nd  |
| BCFA- C17 | 6.9±1.3  | 11.8±1.1 | 12.4±0.6  | 3.3±0.5  | 13.5±2.3     | 1.3±0.1 | 14.9±0.5 | nd  |
| i-C18     | 0.9±0.2  | 0.4±0.1  | 0.3±0.1   | tr       | 0.4±0.1      | tr      | 0.8±0.1  | nd  |
| Total FA  | 78.3±3.5 | 21.3±2.1 | 89.1±5.9  | 10.2±1.5 | 96.0±7.4     | 3.1±0.4 | 99.7±0.3 | nd  |

<sup>a</sup>Cells were grown at 37°C in Spizizen salts MM supplemented with glucose to exponential phase and then shifted to 25°C. Total lipids of *B. subtilis* LC5 expressing the wild type DesA from *B. cereus*, and DesAY40C, BL02692C40Y mutants, were extracted and transesterified to yield FAME. EV represents the *B. subtilis* LC5 strain carrying the empty vector used as a control. The products were identified by GC-MS. Values are the means of the results of three experiments and are expressed as the percentage of total fatty acids (FA). UFA: unsaturated fatty acids, SFA: saturated fatty acids, BCFA: branched chain fatty acids, i: iso-BCFA, n: normal FA, nd: not detected, tr: traces.

**Table S3. Oligonucleotides used in this study**

| Primers                           | Sequence (5'-3')                                | Source/Reference |
|-----------------------------------|-------------------------------------------------|------------------|
| Bc2983-XhoI up                    | GGCTCGAGGAAAGGAATTAGAACAATG                     | This study       |
| Bc2983-low ns                     | CCGAATTCGCAATTTTAGTTCAGATTTTAC                  | This study       |
| BL02692-XhoI up                   | CTCGAGATGAATGACCAAAATCTAAAGAC                   | This study       |
| BL02692-low ns                    | CTCGAGTTTATCCGTTCTTAGTTGCGC                     | This study       |
| BsDes XhoI-up                     | TGGCACTCGAGTATGACTGAACAAACCATTG                 | This study       |
| BsDes EcoRI-low                   | GCTCGGAATTCTCAGGCATTCTCCGCAGCTTC                | This study       |
| Des-Bc2983-Up                     | CATGAACATTCTATTACCAGGCAACTAGCAGC<br>AATCTGGAT   | This study       |
| Bc2983-Des-Low                    | ATCCAGATTGCTGCTAGTTGCGTGGTGAATAGA<br>ATGTTTCATG | This study       |
| Bc2983-Des-Up                     | CACAGCCATTCGATTCATCATGCTACGAGTGGT<br>AATTTGGAT  | This study       |
| Des-Bc2983-Low                    | ATCCAAATTACCACTCGTAGCATGATGAATCGA<br>ATGGCTGTG  | This study       |
| DesA(N)-Bl02692-up                | GAACATTCTATTACCACGCGACAAGCAGCAAC<br>CTGG        | This study       |
| DesA(N)-Bl02692-low               | CCAGGTTGCTGCTTGTCGCGTGGTGAATAGAAT<br>GTTC       | This study       |
| Bl02692(His2)-DesA-up             | CGACCATTCTATCCACCATGCTACGAGTGGTAA<br>TTTGG      | This study       |
| Bl02692(His2)-DesA-low            | CCAAATTACCACTCGTAGCATGGTGGATAGAAT<br>GGTCG      | This study       |
| DesA (N <sub>1</sub> )-BL02692-up | CAAGAATTTTCATTATTTTTTCATGATTGCTGCCA<br>CTATTC   | This study       |
| Bc(N <sub>1</sub> )-Bl02692-low   | GAATAGTGGCAGCAATCATGAAAAATAATGAA<br>AATTCTTG    | This study       |
| DesA-L90R-up                      | GAATAGTTaGAACGTGTATGGGTGTTTTAAC                 | This study       |
| DesA-L90R-low                     | CCCATACACGTTcTAACTATTCTATTTGCACGTC<br>G         | This study       |
| DesA-W104R-up                     | TTGATCAGaGGGGGCATGAACATTCTATTC                  | This study       |
| DesA-W104R-low                    | GTTTCATGCCCCtCTGATCAAATGGGAATAATG               | This study       |
| DesA-R149A-up                     | GCTTATATgcCAATCCATTCGTTATGTTTGG                 | This study       |
| DesA-R149A-low                    | ACGAATGGATTGgcATATAAGCGATATGCTAAA<br>CG         | This study       |
| DesA-K172A-up                     | CTTAAAAATAGATTTAAACCGAgcAGGTGCAAGG<br>CAGAAAG   | This study       |
| DesA-K172A-low                    | CTTTCTGCCTTGCACCTgcTCGGTTAAATCTATTT<br>TTAAG    | This study       |
| DesA-G201A-up                     | GGGCAATTGcGTGGCAATCGTTTCTGTTAG                  | This study       |
| DesA-G201A-low                    | ACGATTGCCACgCAATTGCCAGCAAAGTATAG<br>C           | This study       |
| DesA-H228A-up                     | ACGTACAGgcCACATTTGAAGATTCTTATTTTG               | This study       |
| DesA-H228A-low                    | AATCTTCAAATGTGgcCTGTACGTAAAACAGCC<br>AAATC      | This study       |
| DesA-P257A-up                     | AAGCTTgCTAAAATTTTGAATTCTTAACTGG                 | This study       |

|                           |                                          |            |
|---------------------------|------------------------------------------|------------|
| DesA-P257A-low            | TTGCAAAATTTTAGcAAGCTTATAAAAAGAACT<br>TCC | This study |
| DesA-L275R-up             | TTCACCATcgAAGCCCAAGGGTACCTAAC            | This study |
| DesA-L275R-low            | CCCTTGGGCTTcgATGGTGAACATGATGGAATC        | This study |
| DesA-P277A-up             | ATTTAAGCgCAAGGGTACCTAACTATAAAC           | This study |
| DesA-P277A-low            | TTAGGTACCCTTgGCTTAAATGGTGAACATGA<br>TG   | This study |
| DesA-Y282R-up             | TACCTAACcgTAAACTAGAAGAGGCACAC            | This study |
| DesA-Y282R-low            | TCTAGTTTAcgGTTAGGTACCCTTGGGCTTAAAT<br>G  | This study |
| DesA-L284R-up             | CTATAAACgAGAAGAGGCACACAATAATACGC         | This study |
| DesA-L284R-low            | TGTGCCTCTTCTcGTTTATAGTTAGGTACCCTTG<br>G  | This study |
| B102692 Y26W-I28L-<br>up  | AAAAGCATTTGGCAACTCATTAACACATTGATA<br>C   | This study |
| B102692 Y26W-I28L-<br>low | GTGTTAATGAGTTGCCAAATGCTTTTTTGTAAT<br>CGG | This study |
| B102692 C40Y-up           | CTGTTATGGTATTTAGCATATAAGAGCTTGTC         | This study |
| B102692 C40Y-low          | CTTATATGCTAAATACCATAACAGGAAAAATGG        | This study |
| B102692 F51W-up           | GATTTCTTATTGGCTTACATTAGCGATTTC           | This study |
| B102692 F51W-low          | CTAATGTAAGCCAATAAGAAATCGACAAGCTC         | This study |
| DesA Y40C-up              | ATTTTATGGTGCCTTGCTTATAAAAGTTTGTC         | This study |
| DesA Y40C-low             | TTTATAAGCAAGGCACCATAAAATAATAAATGG        | This study |
| B102692 C40A-up           | CTGTTATGGGCTTTAGCATATAAGAGCTTGTC         | This study |
| B102692 C40A-low          | CTTATATGCTAAATACCCGAACAGGAAAAATGG        | This study |
